# Supplementary material for: Organic Matter and Mineral Composition of Silicate Soils: FTIR Comparison Study by Photoacoustic, Diffuse Reflectance, and Attenuated Total Reflection Modalities
Source: MDPI journal article supplement (doi:10.3390/agronomy11091879), 2021-09-19
Supplement: s1 [file s1]

**Supplementary materials**  
**for**  
**Organic Matter and Mineral Composition of Silicate Soils: FTIR Comparison**  
**Study by Photoacoustic, Diffuse Reflectance, and Attenuated Total Reflection**  
**Modalities**

Dmitry S. Volkov,<sup>a,b</sup> Olga B. Rogova,<sup>b</sup> Mikhail A. Proskurnin\*<sup>a</sup>

*a. Chemistry Department of M.V. Lomonosov Moscow State University, Leninskie Gory, 1-3, GSP-1,  
119991, Moscow, Russia*

*b. Department of Chemistry and Physical Chemistry of Soils, V.V. Dokuchaev Soil Science Institute,  
Pyzhevsky per., 7/2, 119017, Moscow, Russia*

*\* Corresponding author at Chemistry Department of M.V. Lomonosov Moscow State University,  
Leninskie Gory, 1-3, GSP-1, Moscow, Russia, 119991 E-mail address:proskurnin@gmail.com*

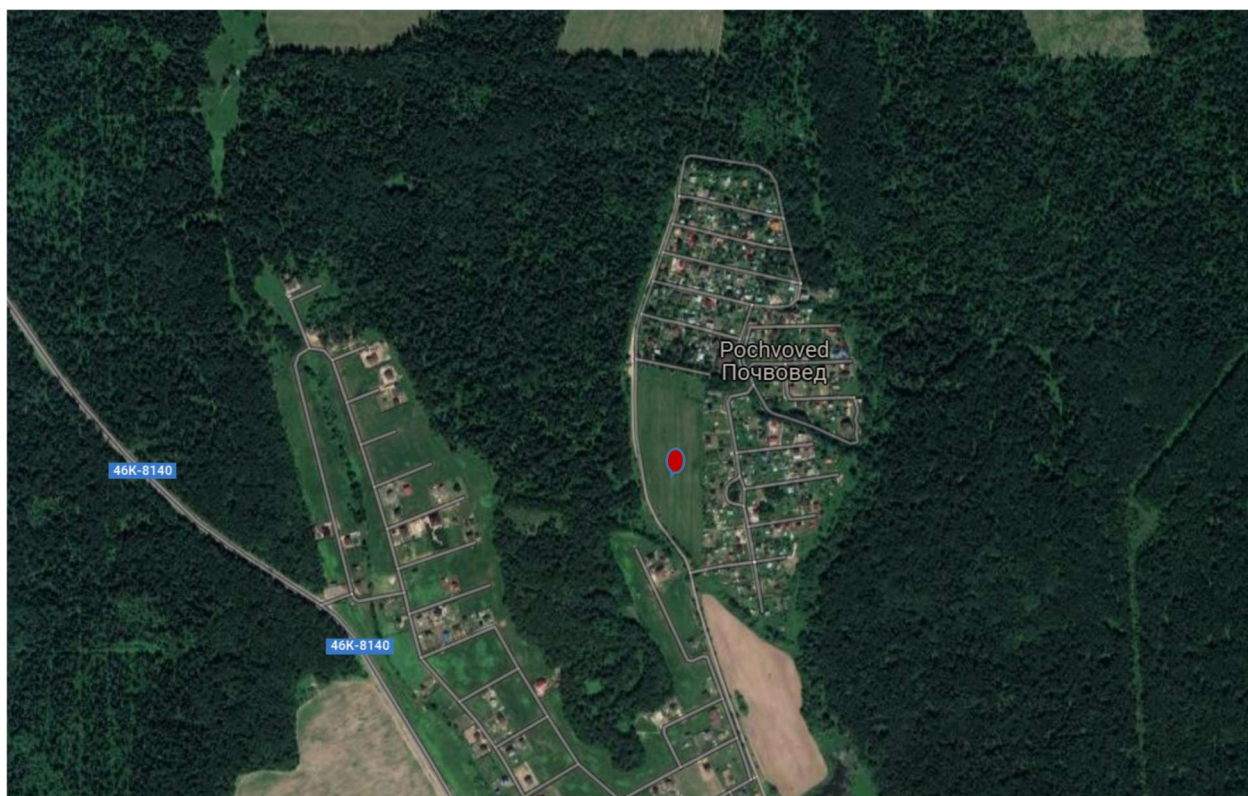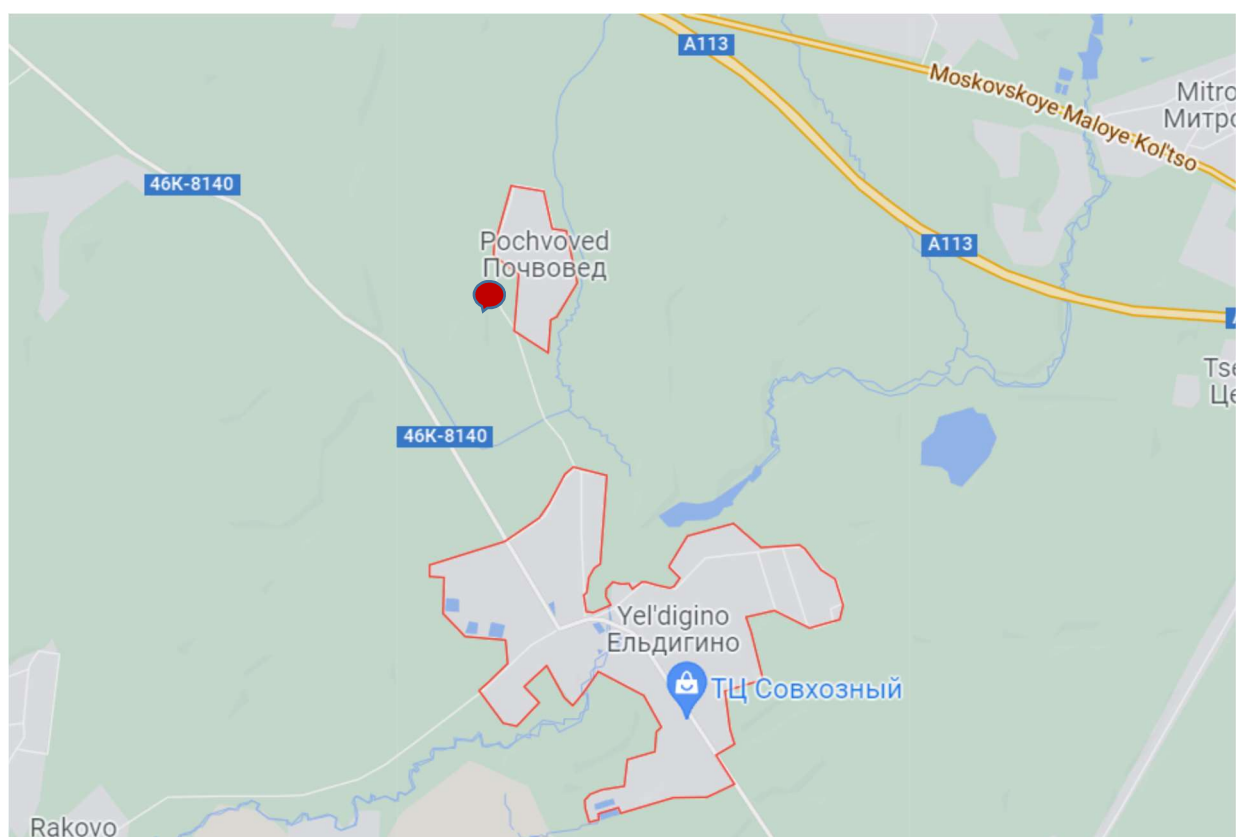

Figure S1. Location of sampling points, a map and satellite pictures. Experimental field of the Zelenograd station of the V.V. Dokuchaev Soil Institute (village of Eldigino, Moscow region, Russia) Red markers on both images are agrosod-podzolic soil. the coordinates of the sampling site are 56° 07' 56" N 37° 48' 09" E

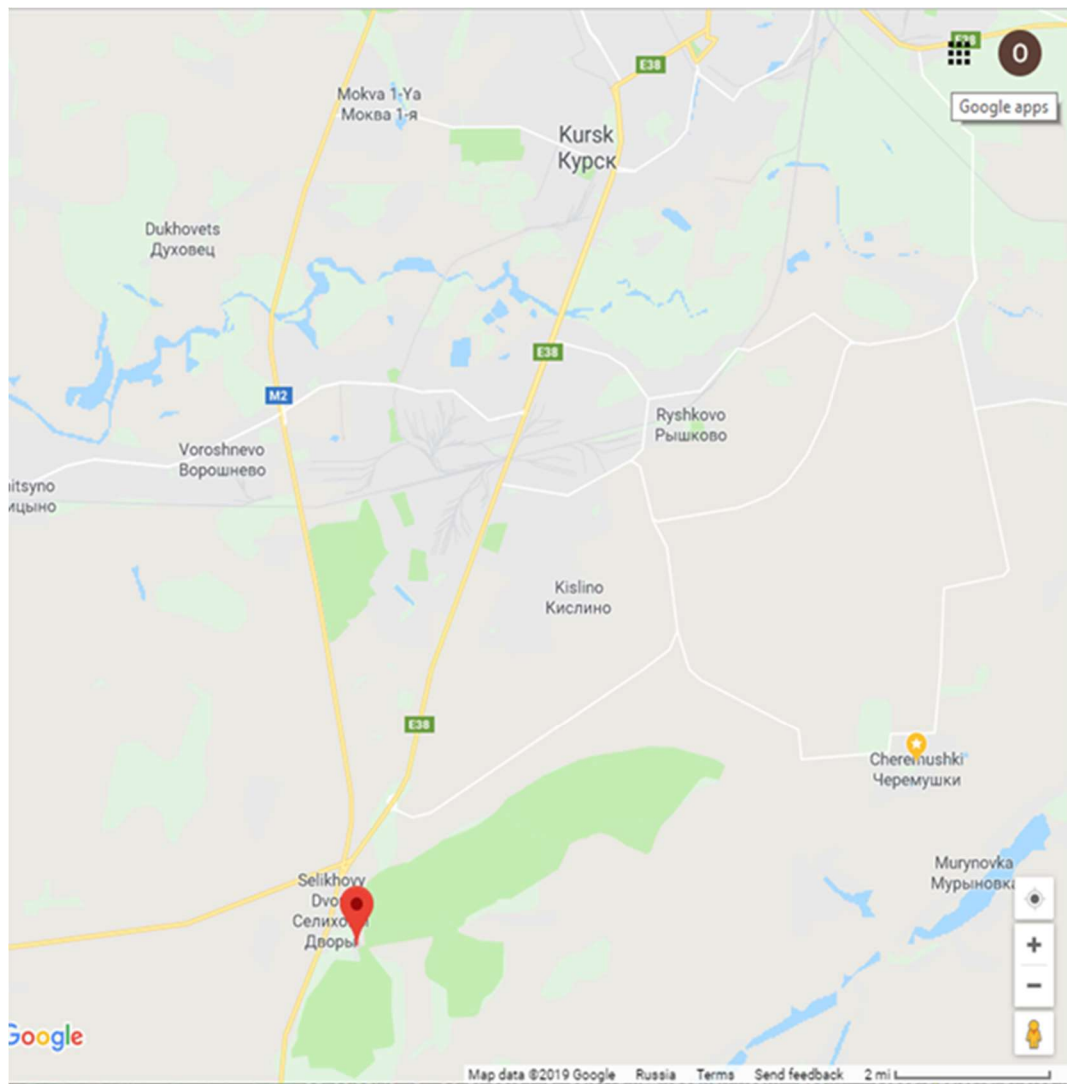

Figure S2. Location of sampling points. A, the positions of natural steppe (red marker, V.V. Alekhin Tsentralno-Chernozemny Nature Reserve) and agrogenic soils (yellow-star marker, Kursk Research Institute of Agricultural Production).

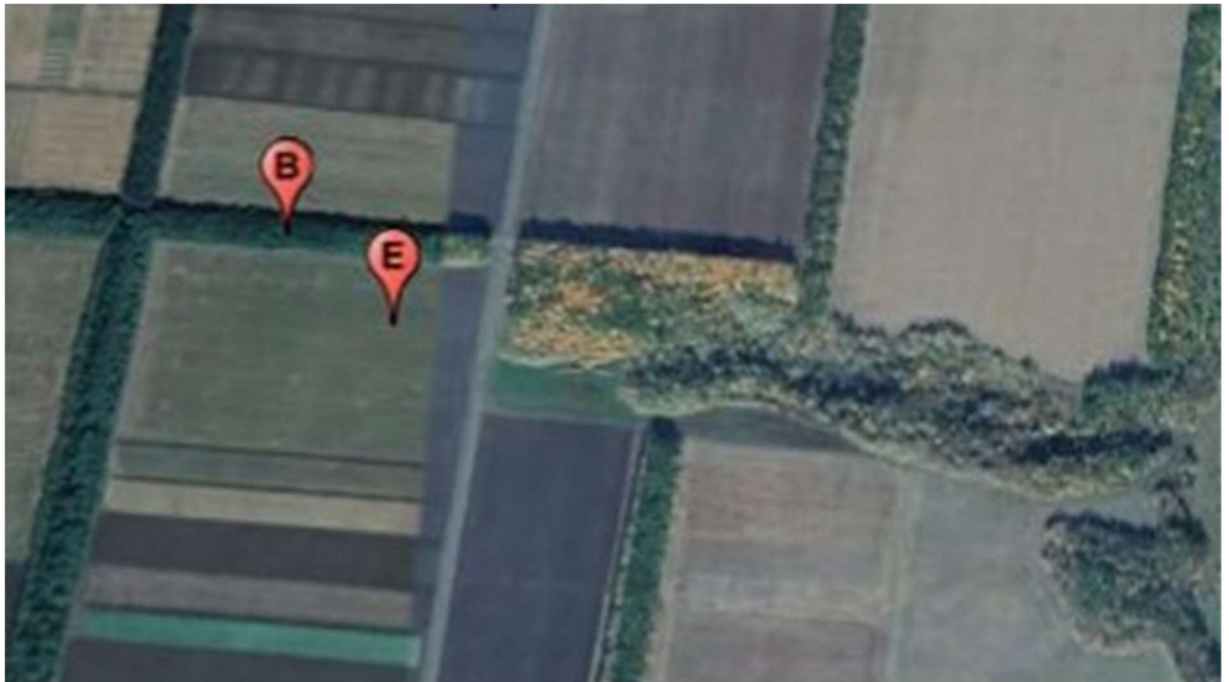

Figure S3. Location of sampling points. Points of selection of agrogenically transformed soils: markers: B, shelterbelt since 1964, E- arable cropland under wheat.

**Table S1.** Parameters of recording spectra by DRIFT

|                                              |                                                                                                  |
|----------------------------------------------|--------------------------------------------------------------------------------------------------|
| Spectral range, cm <sup>-1</sup>             | 7500–200                                                                                         |
| Resolution, cm <sup>-1</sup>                 | 2                                                                                                |
| Background scan                              | 256                                                                                              |
| Sample scan                                  | 256                                                                                              |
| Phase resolution                             | 16                                                                                               |
| Phase correction mode                        | Mertz                                                                                            |
| Zero filling factor                          | 2                                                                                                |
| Apodization function                         | Blackman–Harris 3-Term                                                                           |
| Aperture setting                             | 3 mm                                                                                             |
| Sample and background pre-amplification gain | “Ref” (without amplification) for DLaTGS detector<br>A (standard amplification) for MCT detector |
| Background signal gain                       | Auto                                                                                             |
| Sample signal gain                           | Auto                                                                                             |
| Scanner velocity                             | 10 kHz or 20 kHz (with MCT detector)                                                             |
| Detector                                     | Room temperature DLaTGS or liquid nitrogen cooled photovoltaic MCT                               |
| Source                                       | MIR                                                                                              |
| Beam splitter                                | Wide-range Si                                                                                    |
| Background                                   | Mirror                                                                                           |

**Table S2.** Parameters of recording spectra by ATR–FTIR

|                                              |                                                                                                |
|----------------------------------------------|------------------------------------------------------------------------------------------------|
| Spectral range, cm <sup>-1</sup>             | 4000–100 (with DLaTGS detector) or 6000–800 (with MCT detector)                                |
| Resolution, cm <sup>-1</sup>                 | 2                                                                                              |
| Background scan                              | 128                                                                                            |
| Sample scan                                  | 128                                                                                            |
| Aperture setting                             | 8 mm                                                                                           |
| Phase resolution                             | 4                                                                                              |
| Phase correction mode                        | Mertz                                                                                          |
| Zero filling factor                          | 1                                                                                              |
| Apodization function                         | Blackman–Harris 3-Term                                                                         |
| Sample and background pre-amplification gain | “Ref” (without amplification) for DLaTGS detector<br>B (middle amplification) for MCT detector |
| Background signal gain                       | Auto                                                                                           |
| Sample signal gain                           | Auto                                                                                           |
| Scanner velocity                             | 10 kHz (with DLaTGS detector) or 20 kHz (with MCT detector)                                    |
| Detector                                     | Room temperature DLaTGS or liquid nitrogen cooled photovoltaic MCT                             |
| Source                                       | MIR                                                                                            |
| Beam splitter                                | Si (with DLaTGS detector) or KBr (with MCT detector)                                           |
| Background                                   | Diamond crystal with a lowered pressure screw with a flat end                                  |

**Table S3.** Parameters of recording spectra by FTIR-PAS

|                                              |                             |
|----------------------------------------------|-----------------------------|
| Spectral range, cm <sup>-1</sup>             | 6000–400                    |
| Resolution, cm <sup>-1</sup>                 | 4                           |
| interferometer modulation frequencies (IMF)  | 1.6 and 2.5 kHz             |
| Background scan                              | 64 (1.6 kHz); 128 (2.5 kHz) |
| Sample scan                                  | 64 (1.6 kHz); 256 (2.5 kHz) |
| Phase resolution                             | 10                          |
| Phase correction mode                        | Mertz                       |
| Zero filling factor                          | 2                           |
| Apodization function                         | Blackman–Harris 3-Term      |
| Aperture setting                             | 8 mm                        |
| Sample and background pre-amplification gain | B (middle amplification)    |
| Sample signal gain                           | Auto                        |
| Detector                                     | microphone                  |
| Source                                       | MIR                         |
| Beam splitter                                | KBr                         |

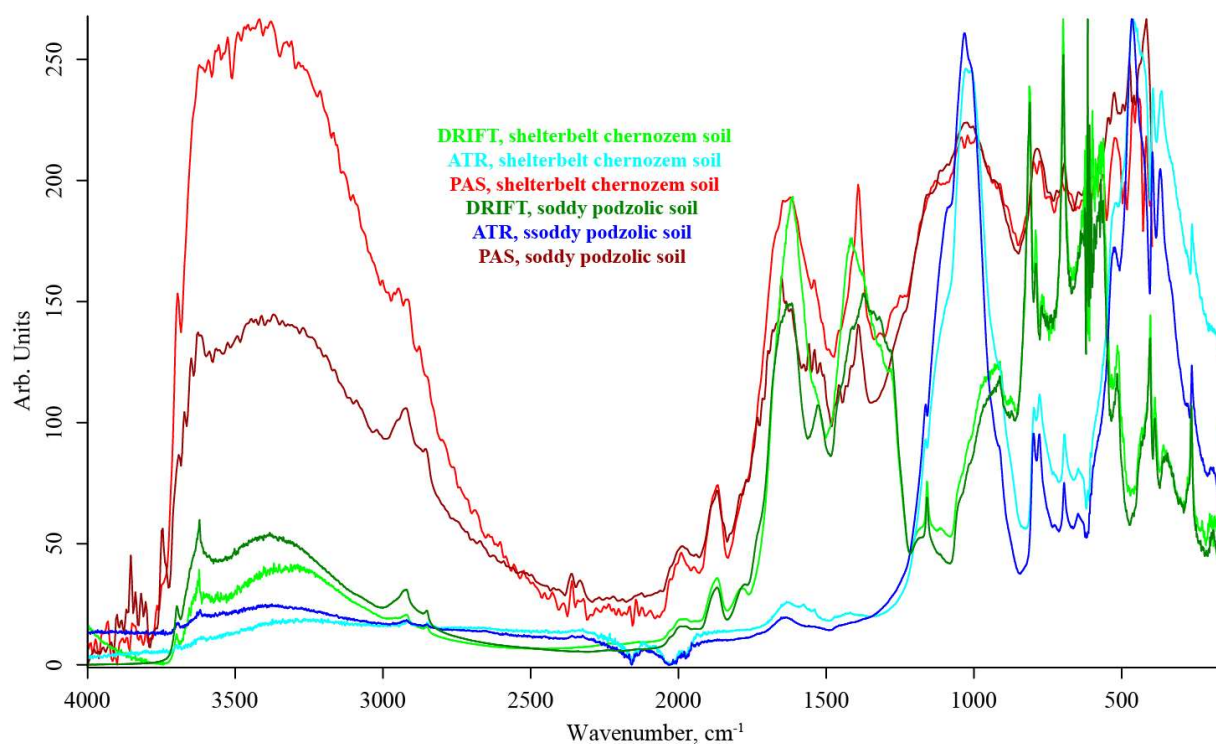

Figure S4. Normalized FTIR spectra in the range 4000–150  $\text{cm}^{-1}$ . DRIFT, ATR, and PAS (IMF, 1.6 kHz) spectra of shelterbelt chernozem soil (dry fractionation, 80–100  $\mu\text{m}$ ), light green, light blue, and light red, respectively; and DRIFT, ATR, and PAS (IMF, 1.6 kHz) spectra of soddy podzolic soil (dry fractionation, 80–90  $\mu\text{m}$ ), dark green, dark blue, and dark red, respectively.
